# Supplementary material for: Insulator-based dielectrophoresis-assisted separation of insulin secretory vesicles
Source: eLife journal article supplement (doi:10.7554/elife.74989), 2024-07-26
Supplement: fig1-figsupp2-data1 [file elife-74989-fig1-figsupp2-data1-v1.pdf]

F1 F2 F3 F4 F5 F6 F7 F8 F9 F10 F11 F12 F13 Ladder\*

Synaptotagmin IX

SEC61 B  
Cytochrome C

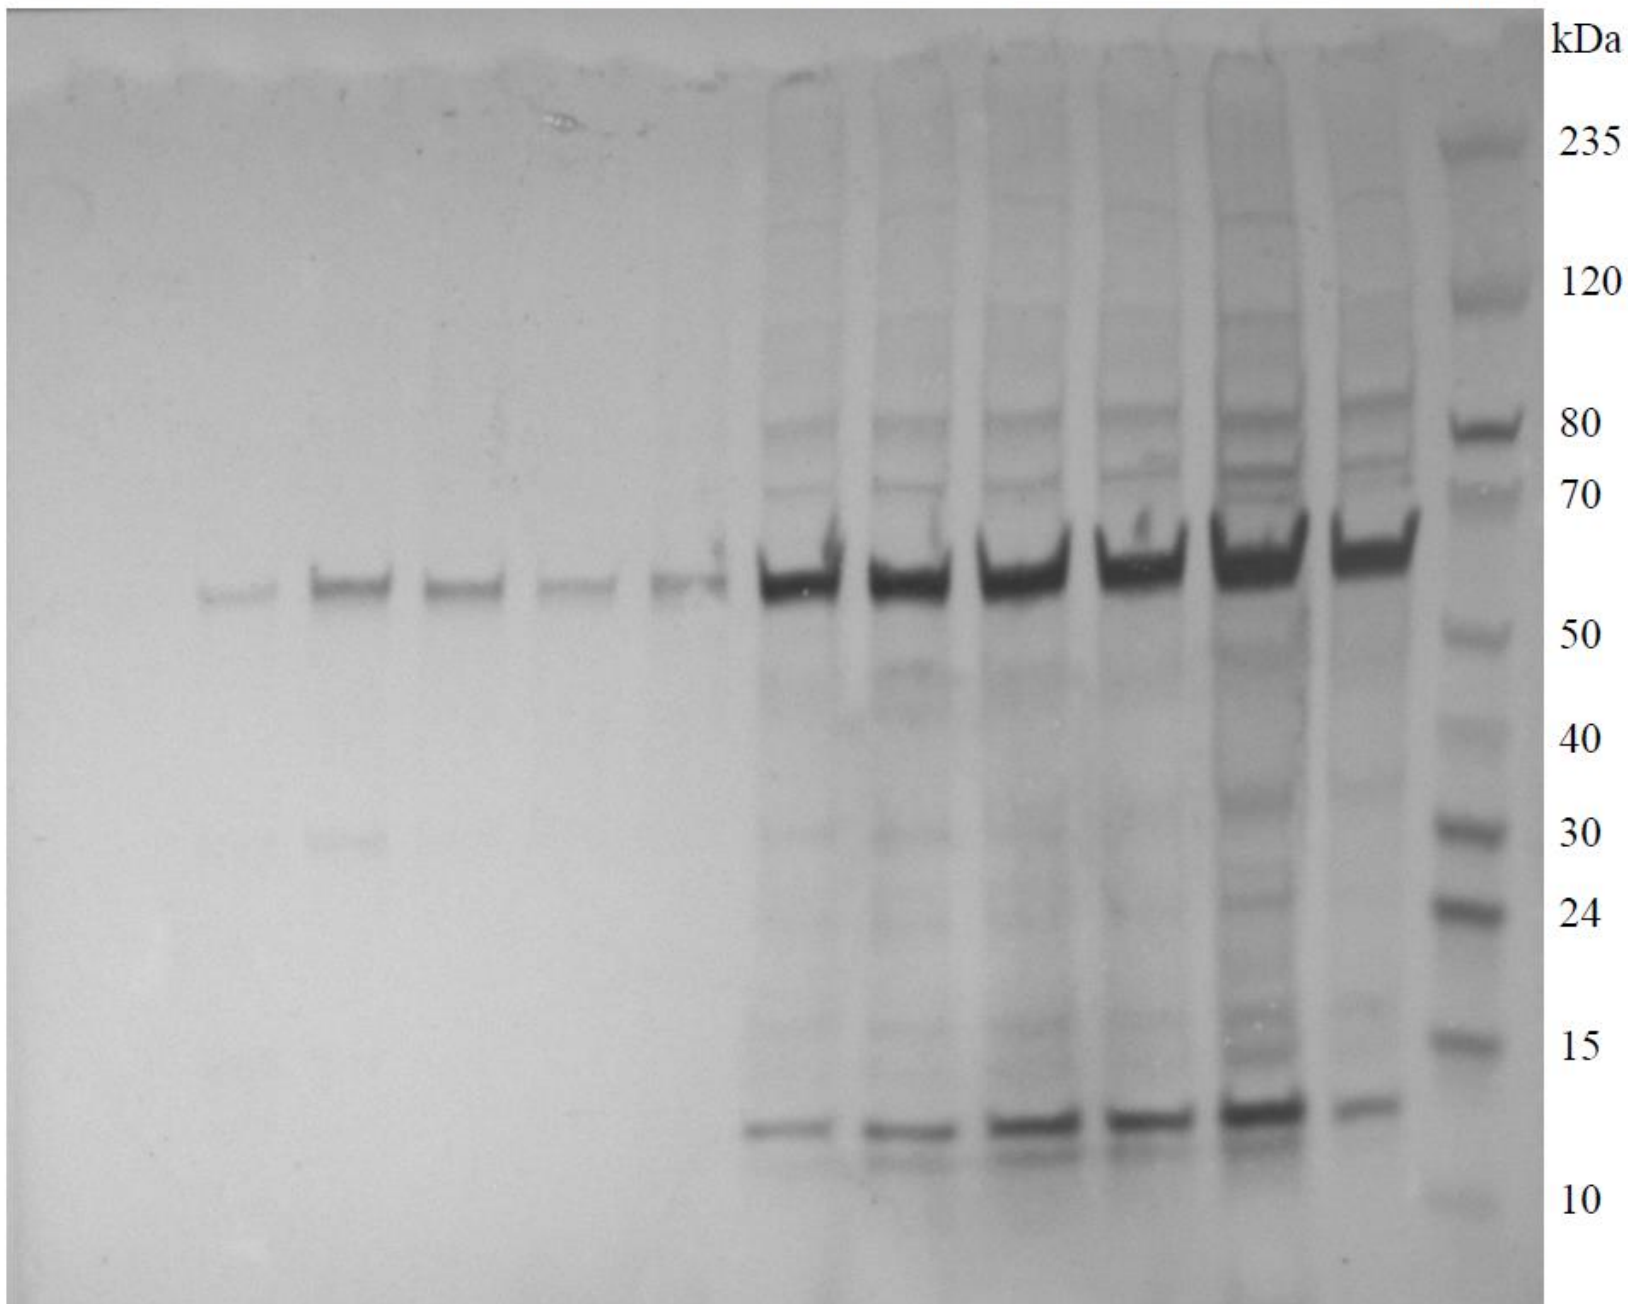

\* Protein ladder (Thermo Fisher Scientific 26634)
