# Supplementary material for: Insulator-based dielectrophoresis-assisted separation of insulin secretory vesicles
Source: eLife journal article supplement (doi:10.7554/elife.74989), 2024-07-26

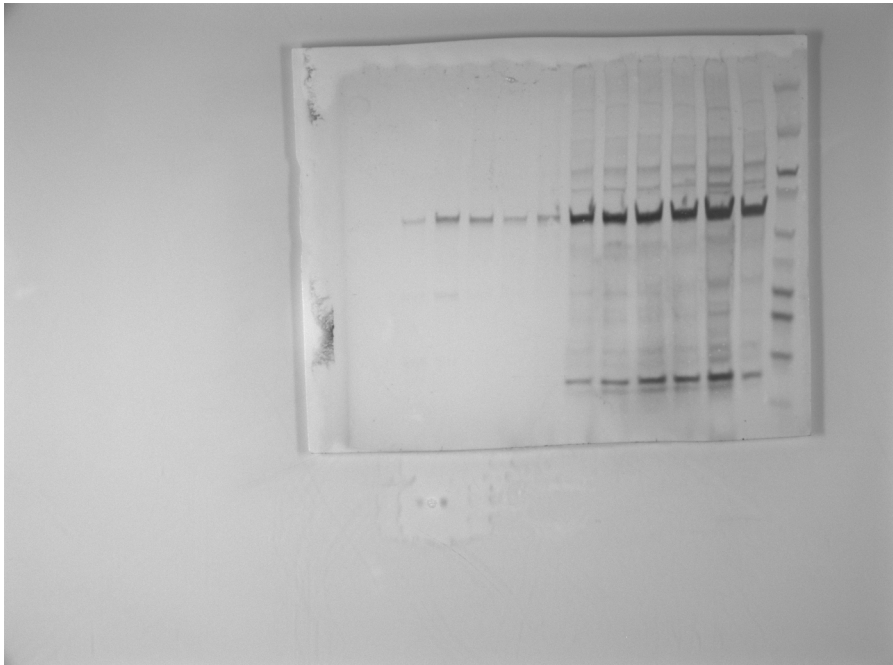

Supplement: fig1-figsupp2-data2 [file elife-74989-fig1-figsupp2-data2-v1.pdf]
