# Supplementary material for: Insulator-based dielectrophoresis-assisted separation of insulin secretory vesicles
Source: eLife. 2024 Aug 27;13:e74989. doi: 10.7554/eLife.74989 (PMC11349295; doi:10.7554/eLife.74989)
Supplement: Figure 4—source data 1. [file elife-74989-fig4-data1.xlsx]

## Sheet: Figure 4
RAW	600 V													900 V													1200 V													1500 V
Gate number		Normal Condition				Glucose Stimulation							EKMr value		Normal Condition				Glucose Stimulation							EKMr value		Normal Condition				Glucose Stimulation							EKMr value		Normal Condition				Glucose Stimulation
Trial No.		1	2	3	avg	1	2	3	4	avg					1	2	3	avg	1	2	3	4	avg					1	2	3	avg	1	2	3	4	avg					1	2	3	avg	1	2	3	4	avg
1-3		0	0	0.137	0.0456667	0	0	0	0	0			0.55		0.709	0.605	0	0.438	0	0.702	0	0	0.1755			0.8		1.01	0.739	2.484	1.411	0.507	0.72	0	0	0.30675			1.1		0.627	0.401	0.696	0.574667	1.83	4.68	0.99		2.5
4-6		0.29	0	0	0.0966667	0	0	0	0	0			1.65		0.614	0.739	0	0.451	0.4489	1.014	1.11	0.27	0.710725			2.45		0.367	0.667	1.253	0.762333	0.291	0.276	0.94	0.35	0.46425			3.25		0.371	0.53	0.925	0.608667	1.48	1.53	0.55		1.18667
7-9		0.846	0.985	0.136	0.655667	1.498	1.582	0.581	0.306	0.99175			2.7		0.785	0.285	0	0.356667	1.1067	0.73	4.735	0.545	1.77917			4.05		0.308	0	1.191	0.499667	2.214	0.551	0.713	0.761	1.05975			5.35		0.683	0.183	0.658	0.508	0.45	2	0.48		0.976667
10-12		0.823	0.688	0.429	0.646667	4.04	2.36	0.472	0	1.718			3.75		0.687	0.534	0.68	0.633667	1.149	0.617	3.779	0.27	1.45375			5.6		0.238	0	0.467	0.235	1.765	0.454	1.476	0.256	0.98775			7.45		0.639	0.391	0.451	0.493667	1.55	1.54	0.24		1.11
13-15		0.245	0.745	0.342	0.444	2.165	1.629	1.679	0.569	1.5105			4.8		0	0.576	0.21	0.262	1.582	1.079	1.687	0.844	1.298			7.15		0.48	0	0.394	0.291333	0.7	0	0.563	0.219	0.3705			9.55		0.331	0.224	0.334	0.296333	1.2	0.08	0.2		0.493333
16-18		0.492	0.968	0.426	0.628667	0.495	1.215	1.386	0.417	0.87825			5.85		0.759	0.483	0	0.414	0.872	1.419	2.328	0.353	1.243			8.7		0.796	0.752	0.885	0.811	1	0.227	0.227	0.743	0.54925			11.65		0	0.477	0.194	0.223667	0.49	0.44	0.22		0.383333
19-21		0	0.862	0.276	0.379333	1.898	1.158	1.221	0.492	1.19225			6.85		0.416	0.912	0	0.442667	1.368	1.155	2.255	0.932	1.4275			10.25		0.772	0	0.363	0.378333	0.138	0.305	0.456	0.49	0.34725			13.7		0.397	0	0.189	0.195333	0	0.63	0.14		0.256667
22-24		0.545	0.3	0.291	0.378667	1.381	1.809	1.607	0.698	1.37375			7.85		0.653	0.273	0.66	0.528667	1.07	0.63	1.254	0.807	0.94025			11.8		0.231	0.281	0.982	0.498	0.14	0.224	0.43	0.653	0.36175			15.75		0	0	0	0	0	0.36	0.22		0.193333
25-27		0.264	0.515	0.275	0.351333	1.296	1.526	0.604	0.764	1.0475			8.9		0.715	0.505	0.23	0.483333	0.447	0.289	0.703	0.577	0.504			13.35		0.431	0.486	1.714	0.877	0.32	0.376	0.68	0.585	0.49025			17.8		0	0.212	0	0.0706667	0.59	0.11	0.16		0.286667
MIN		0	0	0		0	0	0	0						0	0.273	0		0	0.289	0	0						0.231	0	0.363		0.138	0	0	0						0	0	0		0	0.08	0.14
MAX		0.846	0.985	0.429		4.04	2.36	1.679	0.764						0.785	0.912	0.68		1.582	1.419	4.735	0.932						1.01	0.752	2.484		2.214	0.72	1.476	0.761						0.683	0.53	0.925		1.83	4.68	0.99
Normalized	600 V													900 V													1200 V													1500 V
Gate number		Normal Condition				Glucose Stimulation						Adjusted P value	EKMr value		Normal Condition				Glucose Stimulation						Adjusted P value	EKMr value		Normal Condition				Glucose Stimulation						Adjusted P value	EKMr value		Normal Condition				Glucose Stimulation
Trial No.		1	2	3		1	2	3	4						1	2	3		1	2	3	4						1	2	3		1	2	3	4						1	2	3		1	2	3	4
1-3		0	0	0.319347		0	0	0	0			>0.9999	0.55		0.903185	0.519562	0		0	0.365487	0	0			>0.9999	0.8		1	0.982713	1		0.177746	1	0	0			0.0249	1.1		0.918009	0.756604	0.752432		1	1	1
4-6		0.34279	0	0		0	0	0	0			>0.9999	1.65		0.782166	0.729264	0		0.283755	0.641593	0.234424	0.2897			>0.9999	2.45		0.174583	0.886968	0.419613		0.0736994	0.383333	0.636856	0.459921			>0.9999	3.25		0.543192	1	1		0.808743	0.315217	0.482353
7-9		1	1	0.317016		0.370792	0.670339	0.346039	0.400524			>0.9999	2.7		1	0.0187793	0		0.699558	0.390265	1	0.584764			>0.9999	4.05		0.0988447	0	0.390382		1	0.765278	0.483062	1			0.0469	5.35		1	0.345283	0.711351		0.245902	0.417391	0.4
10-12		0.972813	0.698477	1		1	1	0.28112	0			>0.9999	3.75		0.875159	0.408451	1		0.726296	0.290265	0.798099	0.2897			>0.9999	5.6		0.00898588	0	0.0490335		0.783719	0.630556	1	0.336399			0.0369	7.45		0.935578	0.737736	0.487568		0.846995	0.317391	0.117647
13-15		0.289598	0.756345	0.797203		0.535891	0.690254	1	0.744764			>0.9999	4.8		0	0.474178	0.308824		1	0.699115	0.356283	0.905579			0.6459	7.15		0.319641	0	0.0146157		0.270713	0	0.381436	0.287779			>0.9999	9.55		0.484627	0.422642	0.361081		0.655738	0	0.0705882
16-18		0.58156	0.982741	0.993007		0.122525	0.514831	0.825491	0.545812			0.7963	5.85		0.966879	0.328638	0		0.551201	1	0.491658	0.378755			>0.9999	8.7		0.725289	1	0.24611		0.415222	0.315278	0.153794	0.976347			>0.9999	11.65		0	0.9	0.20973		0.26776	0.0782609	0.0941176
19-21		0	0.875127	0.643357		0.469802	0.490678	0.727219	0.643979			>0.9999	6.85		0.529936	1	0		0.864728	0.766372	0.476241	1			>0.9999	10.25		0.69448	0	0		0	0.423611	0.308943	0.64389			>0.9999	13.7		0.581259	0	0.204324		0	0.119565	0
22-24		0.644208	0.304569	0.678322		0.341832	0.766525	0.957117	0.913613			>0.9999	7.85		0.831847	0	0.970588		0.676359	0.30177	0.264836	0.86588			>0.9999	11.8		0	0.37367	0.291843		0.000963391	0.311111	0.291328	0.858081			>0.9999	15.75		0	0	0		0	0.0608696	0.0941176
25-27		0.312057	0.522843	0.641026		0.320792	0.64661	0.359738	1			>0.9999	8.9		0.910828	0.363067	0.338235		0.282554	0	0.148469	0.619099			>0.9999	13.35		0.256739	0.646277	0.636964		0.0876686	0.522222	0.460705	0.768725			>0.9999	17.8		0	0.4	0		0.322404	0.00652174	0.0235294
																												Source of Variation	% of total variation	P value
																												Interaction	33.07	0.0026
																												EKMr	16.71	0.0972
																												Condition	1.089	0.3346
